# Supplementary material for: Comprehensive Examination of Cholangiocarcinoma Patients Treated with Novel Targeted Therapies after Extended Molecular Profiling on Liquid Biopsies
Source: MDPI journal article supplement (doi:10.3390/cancers16040697), 2024-02-06
Supplement: s1 [file s1]

## **Supplementary Tables**

**Supplementary Table S1:** Assessment of CCA lesions based on the RECIST 1.1 criteria.

| <b>Response</b>     | <b>Target lesions</b>                                                                                             | <b>Non-target</b>                             | <b>New Lesions</b>                     |
|---------------------|-------------------------------------------------------------------------------------------------------------------|-----------------------------------------------|----------------------------------------|
| Complete response   | Disappearance of all target lesions                                                                               | Disappearance of all non-target lesions       | No development of new lesions          |
|                     | Lymph node axis < 10 mm                                                                                           | Lymph node axis < 10 mm                       |                                        |
| Partial response    | $\geq 30\%$ decrease in sum of longest diameter from baseline ( $\geq 4$ weeks)                                   | No progression                                | No development of new lesions          |
| Progressive disease | $\geq 20\%$ increase in sum of longest diameter from Nadir with an absolute sum of diameters increase $\geq 5$ mm | Unequivocal progression in lesion size        | Unequivocal development of new lesions |
| Stable disease      | Neither partial response nor progressive disease with the Nadir as reference point                                | Persistence of one or more non-target lesions | No development of new lesions          |

**Supplementary Table S2:** Systemic treatment types stratified by treatment lines among evaluated patients (N = 56).

|                                                    | Total number of subjects |            |
|----------------------------------------------------|--------------------------|------------|
|                                                    | N                        | %          |
| <b>1<sup>st</sup> line systemic therapy</b>        | <b>56</b>                | <b>100</b> |
| Chemotherapy                                       |                          |            |
| Cisplatin and gemcitabine                          | 38                       | 68         |
| Capecitabine                                       | 5                        | 9          |
| Capecitabine and gemcitabine                       | 2                        | 4          |
| Carboplatin and etoposide                          | 2                        | 4          |
| Carboplatin and gemcitabine                        | 2                        | 4          |
| Oxaliplatin and gemcitabine                        | 1                        | 2          |
| Paclitaxel and gemcitabine                         | 1                        | 2          |
| Cisplatin and pemetrexed                           | 1                        | 2          |
| Chemotherapy and immunotherapy                     |                          |            |
| Cisplatin, gemcitabine and Arginase inhibitor      | 1                        | 2          |
| Cisplatin, gemcitabine and Durvalumab              | 2                        | 4          |
| Targeted therapy                                   |                          |            |
| Ivosidenib                                         | 1                        | 2          |
| <b>2<sup>nd</sup> line systemic therapy</b>        | <b>55</b>                | <b>100</b> |
| Chemotherapy                                       |                          |            |
| Capecitabine                                       | 2                        | 4          |
| Carboplatin and gemcitabine                        | 2                        | 4          |
| Cisplatin and gemcitabine                          | 4                        | 7          |
| Cisplatin, gemcitabine and TAS-102                 | 1                        | 2          |
| Epirubicin, oxaliplatin and capecitabine           | 1                        | 2          |
| FOLFOX                                             | 9                        | 16         |
| Unknown 2 <sup>nd</sup> line chemotherapeutic drug | 1                        | 2          |
| Targeted therapy                                   |                          |            |
| Futibatinib                                        | 11                       | 20         |
| Regorafenib                                        | 9                        | 16         |
| Olaparib                                           | 7                        | 13         |

|                                             |           |            |
|---------------------------------------------|-----------|------------|
| Derazantinib                                | 3         | 5          |
| Zanidatamab                                 | 2         | 4          |
| Erdafitinib                                 | 1         | 2          |
| Ivosidenib                                  | 1         | 2          |
| Targeted therapy and chemotherapy           |           |            |
| Encorafenib and cetuximab                   | 1         | 2          |
| <b>3<sup>rd</sup> line systemic therapy</b> | <b>29</b> | <b>100</b> |
| Chemotherapy                                |           |            |
| FOLFOX                                      | 7         | 24         |
| Cisplatin and gemcitabine                   | 3         | 10         |
| Targeted therapy                            |           |            |
| Futibatinib                                 | 7         | 24         |
| Regorafenib                                 | 5         | 17         |
| Derazantinib                                | 3         | 10         |
| Pertuzumab and trastuzumab                  | 1         | 3          |
| Zanidatamab                                 | 1         | 3          |
| Targeted therapy and chemotherapy           |           |            |
| Encorafenib and cetuximab                   | 1         | 3          |
| Targeted therapy and immunotherapy          |           |            |
| Bintrafusp alfa                             | 1         | 3          |
| <b>4<sup>th</sup> line systemic therapy</b> | <b>9</b>  | <b>100</b> |
| Chemotherapy                                |           |            |
| FOLFOX                                      | 1         | 11         |
| Cisplatin and gemcitabine                   | 1         | 11         |
| FOLFIRI                                     | 1         | 11         |
| Targeted therapy                            |           |            |
| Futibatinib                                 | 3         | 33         |
| Regorafenib                                 | 3         | 33         |
| <b>5<sup>th</sup> line systemic therapy</b> | <b>3</b>  | <b>100</b> |
| Chemotherapy                                |           |            |
| Capecitabine                                | 1         | 33         |
| Gemcitabine                                 | 1         | 33         |
| Cisplatin and gemcitabine                   | 1         | 33         |

|                                             |          |            |
|---------------------------------------------|----------|------------|
| <b>6<sup>th</sup> line systemic therapy</b> | <b>3</b> | <b>100</b> |
| Chemotherapy                                |          |            |
| Oxaliplatin and Capecitabine                | 1        | 33         |
| Targeted therapy                            |          |            |
| Crizotinib                                  | 1        | 33         |
| Ivosidenib                                  | 1        | 33         |

**Supplementary Table S3:** Associations with OS.

|                                                                  | OS                        |         |                                      |         |
|------------------------------------------------------------------|---------------------------|---------|--------------------------------------|---------|
|                                                                  | Univariate HR<br>(95% CI) | p-value | Adjusted HR<br>(95% CI) <sup>a</sup> | p-value |
| <b>Age</b> (< 70 years vs ≥ 70 years)                            | 0.54<br>(0.25 – 1.21)     | 0.14    | N/A                                  | N/A     |
| <b>Gender</b> (Male vs Female)                                   | 0.61<br>(0.30 – 1.23)     | 0.17    | N/A                                  | N/A     |
| <b>Smoking status</b> (Current or former smoker vs never smoker) | 0.79<br>(0.30 – 2.14)     | 0.65    | N/A                                  | N/A     |
| <b>CCA subtype</b>                                               |                           |         |                                      |         |
| Hilar                                                            | -                         | -       | -                                    | -       |
| Intrahepatic                                                     | 2.09<br>(0.45 – 9.80)     | 0.35    | N/A                                  | N/A     |
| Extrahepatic                                                     | 1.03<br>(0.19 – 5.49)     | 0.97    | N/A                                  | N/A     |
| <b>FGFR status</b> (Pathogenic variant vs wild type)             | 1.12<br>(0.56 – 2.23)     | 0.75    | N/A                                  | N/A     |
| <b>BRCA status</b> (Pathogenic variant vs wild type)             | 1.44<br>(0.64 – 3.25)     | 0.38    | N/A                                  | N/A     |
| <b>Prior CCA related surgical history</b>                        | 0.39<br>(0.18 – 0.82)     | 0.01    | 0.30<br>(0.11 – 0.80)                | 0.02    |

|                                                                                                     |                       |         |                        |         |
|-----------------------------------------------------------------------------------------------------|-----------------------|---------|------------------------|---------|
| <b>Total number of systemic treatment lines (&gt; 2 lines vs ≤ 2 lines)</b>                         | 0.60<br>(0.30 – 1.18) | 0.14    | N/A                    | N/A     |
| <b>Best overall response on 2<sup>nd</sup> line targeted therapy (Responders vs Non-Responders)</b> | 0.26<br>(0.09 – 0.77) | 0.02    | 0.23<br>(0.07 – 0.75)  | 0.02    |
| <b>Nature of 2<sup>nd</sup> line targeted therapy (Futibatinib vs other targeted therapies)</b>     | 0.77<br>(0.34 – 1.76) | 0.54    | N/A                    | N/A     |
| <b>Duration of 2<sup>nd</sup> line targeted therapy (&gt; 3.52 months vs ≤ 3.52 months)</b>         | 0.18<br>(0.07 – 0.46) | < 0.001 | 0.02<br>(0.002 – 0.14) | < 0.001 |
| <b>Best overall response on 3<sup>rd</sup> line targeted therapy (Responders vs Non-Responders)</b> | 0.54<br>(0.14 – 2.02) | 0.36    | N/A                    | N/A     |
| <b>Nature of 3<sup>rd</sup> line targeted therapy (Futibatinib vs other targeted therapies)</b>     | 1.05<br>(0.32 – 3.46) | 0.94    | N/A                    | N/A     |
| <b>Duration of 3<sup>rd</sup> line targeted therapy (&gt; 4.37 months vs ≤ 4.37 months)</b>         | 0.21<br>(0.04 – 0.96) | 0.04    | 0.23<br>(0.03 – 1.68)  | 0.15    |

<sup>a</sup> Adjusted analysis by age, gender and CCA subtype.

Abbreviations: BRCA, BRCA1/2 gene; CCA, Cholangiocarcinoma; CI, Confidence Interval; FGFR, Fibroblast Growth Factor Receptor gene; HR, Hazard Ratio; N/A, Not Applicable; OS, Overall Survival.

**Supplementary Table S4:** Best overall response following 1<sup>st</sup> line treatment with systemic agents (N = 56).

|                                                            | Total number of subjects |    |
|------------------------------------------------------------|--------------------------|----|
|                                                            | N                        | %  |
| <b>Response status on chemotherapeutic regimens</b>        |                          |    |
| Complete response                                          | 1                        | 2  |
| Partial response                                           | 13                       | 23 |
| Stable disease                                             | 14                       | 25 |
| Progressive disease                                        | 15                       | 27 |
| Unevaluable                                                | 9                        | 16 |
| <b>Response status on chemo-immunotherapeutic regimens</b> |                          |    |
| Stable disease                                             | 2                        | 4  |
| Progressive disease                                        | 1                        | 2  |

|                                           |   |   |
|-------------------------------------------|---|---|
| <b>Response status on targeted agents</b> |   |   |
| Stable disease                            | 1 | 2 |

**Supplementary Table S5:** Best overall response following 2<sup>nd</sup> line treatment with chemotherapeutic regimens and targeted agents (N = 55).

|                                                             | <b>Total number of subjects</b> |          |
|-------------------------------------------------------------|---------------------------------|----------|
| <b>Response status on chemotherapeutic regimens</b>         | <b>N</b>                        | <b>%</b> |
| Partial response                                            | 5                               | 9        |
| Stable disease                                              | 7                               | 13       |
| Progressive disease                                         | 5                               | 9        |
| Unevaluable                                                 | 3                               | 5        |
| <b>Response status on targeted agents</b>                   |                                 |          |
| Partial response                                            | 10                              | 18       |
| Stable disease                                              | 8                               | 15       |
| Progressive disease                                         | 15                              | 27       |
| Unevaluable                                                 | 1                               | 2        |
| <b>Response status on targeted therapy and chemotherapy</b> |                                 |          |
| Partial response                                            | 1                               | 2        |

**Supplementary Table S6:** Best overall response following 3<sup>rd</sup> line treatment with chemotherapeutic regimens and targeted agents (N = 29).

|                                                            | <b>Total number of subjects</b> |          |
|------------------------------------------------------------|---------------------------------|----------|
| <b>Response status on chemotherapeutic regimens</b>        | <b>N</b>                        | <b>%</b> |
| Partial response                                           | 2                               | 7        |
| Stable disease                                             | 3                               | 10       |
| Progressive disease                                        | 5                               | 17       |
| <b>Response status on targeted agents</b>                  |                                 |          |
| Partial response                                           | 7                               | 24       |
| Stable disease                                             | 3                               | 10       |
| Progressive disease                                        | 7                               | 24       |
| <b>Response status on targeted agent and chemotherapy</b>  |                                 |          |
| Stable disease                                             | 1                               | 3        |
| <b>Response status on targeted agent and immunotherapy</b> |                                 |          |
| Partial response                                           | 1                               | 3        |
